# Supplementary material for: Hope for GWAS: Relevant Risk Genes Uncovered from GWAS Statistical Noise
Source: PubMed Central journal article supplement (PMC4227180; doi:10.3390/ijms151017601), 2014-09-29

# Supplementary Information

**Table S1.** GWAS datasets used in the analysis.

| Disease                      | # Cases | # Controls | # SNPs Analyzed <sup>1</sup> | Number of Proteins Used for Each <i>p</i> -Value Threshold <sup>2</sup> | GWAS Study                         | dbGAP Dataset |
|------------------------------|---------|------------|------------------------------|-------------------------------------------------------------------------|------------------------------------|---------------|
| Multiple Sclerosis           | 978     | 883        | 245 694                      | 2903; 1040; 438; 205; 106; 54; 27; 17; 11; 8                            | Baranzini <i>et al.</i> , 2009     | pha002861     |
| Systemic Lupus Erythematosus | 1311    | 1783       | 237 603                      | 2640; 857; 340; 180; 116; 90; 73; 62; 51; 48                            | Hom <i>et al.</i> , 2008           | pha002848     |
| Type 1 diabetes              | 4000    | 3999       | 242 898                      | 2170; 582; 264; 189; 163; 140; 134; 129; 126; 120                       | Barrett <i>et al.</i> , 2009       | pha002862     |
| Breast Cancer                | 1145    | 1142       | 225 246                      | 2862; 1015; 386; 150; 75; 31; 15; 9; 6; 2                               | Hunter <i>et al.</i> , 2007        | pha002853     |
| Neuroblastoma                | 1032    | 2043       | 223 442                      | 2878; 1071; 437; 191; 105; 53; 27; 13; 7; 4                             | Maris <i>et al.</i> , 2008         | pha002845     |
| Parkinson's Disease          | 1713    | 3978       | 221 465                      | 2875; 1047; 415; 182; 93; 43; 28; 16; 12; 10                            | Simon-Sanchez <i>et al.</i> , 2009 | pha002868     |

<sup>1</sup> Only SNPs mapping within RefSeq gene +/- 10 kb were used; <sup>2</sup> values are presented for  $-\text{Log}_{10}p$  value = 0.5; 1; 1.5; 2; 2.5; 3; 3.5; 4; 4.5; 5.

**Table S2.** Significantly enriched canonical pathways in the breast cancer LCC.

| Term                                                | Count | %      | <i>p</i> -Value         | Benjamini               |
|-----------------------------------------------------|-------|--------|-------------------------|-------------------------|
| P00021: FGF signaling pathway                       | 22    | 5.5556 | $7.7353 \times 10^{-7}$ | $6.0334 \times 10^{-5}$ |
| hsa04012: ErbB signaling pathway                    | 15    | 3.7879 | $5.1188 \times 10^{-6}$ | $9.7253 \times 10^{-5}$ |
| hsa04662: B cell receptor signaling pathway         | 14    | 3.5354 | $4.8063 \times 10^{-6}$ | $1.0653 \times 10^{-4}$ |
| hsa04660: T cell receptor signaling pathway         | 17    | 4.2929 | $3.2812 \times 10^{-6}$ | $1.0909 \times 10^{-4}$ |
| hsa04722: Neurotrophin signaling pathway            | 18    | 4.5455 | $4.7793 \times 10^{-6}$ | $1.2712 \times 10^{-4}$ |
| hsa04650: Natural killer cell mediated cytotoxicity | 19    | 4.7980 | $2.9961 \times 10^{-6}$ | $1.3282 \times 10^{-4}$ |
| hsa04010: MAPK signaling pathway                    | 29    | 7.3232 | $1.0688 \times 10^{-6}$ | $1.4215 \times 10^{-4}$ |
| hsa05200: Pathways in cancer                        | 32    | 8.0808 | $2.5837 \times 10^{-6}$ | $1.7180 \times 10^{-4}$ |
| hsa05220: Chronic myeloid leukemia                  | 13    | 3.2828 | $2.6239 \times 10^{-5}$ | $3.4893 \times 10^{-4}$ |
| hsa04810: Regulation of actin cytoskeleton          | 23    | 5.8081 | $2.4952 \times 10^{-5}$ | $3.6867 \times 10^{-4}$ |
| hsa05215: Prostate cancer                           | 14    | 3.5354 | $3.2983 \times 10^{-5}$ | $3.9873 \times 10^{-4}$ |
| hsa05213: Endometrial cancer                        | 11    | 2.7778 | $2.4175 \times 10^{-5}$ | $4.0183 \times 10^{-4}$ |
| hsa05214: Glioma                                    | 11    | 2.7778 | $1.3435 \times 10^{-4}$ | 0.0015                  |
| hsa05223: Non-small cell lung cancer                | 10    | 2.5253 | $1.9906 \times 10^{-4}$ | 0.0020                  |
| hsa05218: Melanoma                                  | 11    | 2.7778 | $3.6997 \times 10^{-4}$ | 0.0033                  |
| hsa05210: Colorectal cancer                         | 12    | 3.0303 | $3.6244 \times 10^{-4}$ | 0.0034                  |
| hsa04360: Axon guidance                             | 15    | 3.7879 | $4.3509 \times 10^{-4}$ | 0.0036                  |
| hsa04510: Focal adhesion                            | 19    | 4.7980 | $7.3750 \times 10^{-4}$ | 0.0054                  |
| hsa04310: Wnt signaling pathway                     | 16    | 4.0404 | $7.0625 \times 10^{-4}$ | 0.0055                  |
| REACT_9470: Signaling by FGFR                       | 7     | 1.7677 | $2.1350 \times 10^{-4}$ | 0.0059                  |
| REACT_11061: Signalling by NGF                      | 19    | 4.7980 | $3.2601 \times 10^{-4}$ | 0.0060                  |
| hsa04062: Chemokine signaling pathway               | 18    | 4.5455 | $8.7483 \times 10^{-4}$ | 0.0061                  |
| hsa04630: Jak-STAT signaling pathway                | 16    | 4.0404 | $9.2863 \times 10^{-4}$ | 0.0062                  |
| REACT_9417: Signaling by EGFR                       | 9     | 2.2727 | $6.3074 \times 10^{-4}$ | 0.0086                  |
| REACT_498: Signaling by insulin receptor            | 9     | 2.2727 | $1.6422 \times 10^{-4}$ | 0.0090                  |

Table S2. Cont

| Term                                                                      | Count | %      | <i>p</i> -Value         | Benjamini |
|---------------------------------------------------------------------------|-------|--------|-------------------------|-----------|
| hsa05221: Acute myeloid leukemia                                          | 9     | 2.2727 | 0.0016                  | 0.0099    |
| hsa04622: RIG-I-like receptor signaling pathway                           | 10    | 2.5253 | 0.0016                  | 0.0099    |
| hsa04210: Apoptosis                                                       | 11    | 2.7778 | 0.0019                  | 0.0107    |
| P00047: PDGF signaling pathway                                            | 21    | 5.3030 | $2.8445 \times 10^{-4}$ | 0.0110    |
| hsa04910: Insulin signaling pathway                                       | 14    | 3.5354 | 0.0021                  | 0.0117    |
| REACT_16888: Signaling by PDGF                                            | 10    | 2.5253 | 0.0012                  | 0.0134    |
| hsa04520: Adherens junction                                               | 10    | 2.5253 | 0.0028                  | 0.0147    |
| hsa04114: Oocyte meiosis                                                  | 12    | 3.0303 | 0.0034                  | 0.0175    |
| P04393: Ras Pathway                                                       | 13    | 3.2828 | $9.9547 \times 10^{-4}$ | 0.0192    |
| P00053: T cell activation                                                 | 15    | 3.7879 | 0.0015                  | 0.0226    |
| P00010: B cell activation                                                 | 12    | 3.0303 | 0.0021                  | 0.0229    |
| P00018: EGF receptor signaling pathway                                    | 17    | 4.2929 | $9.0451 \times 10^{-4}$ | 0.0233    |
| REACT_578: Apoptosis                                                      | 14    | 3.5354 | 0.0026                  | 0.0237    |
| P00031: Inflammation mediated by chemokine and cytokine signaling pathway | 27    | 6.8182 | 0.0020                  | 0.0253    |
| hsa05211: Renal cell carcinoma                                            | 9     | 2.2727 | 0.0054                  | 0.0265    |
| REACT_6900: Signaling in Immune system                                    | 23    | 5.8081 | 0.0035                  | 0.0273    |
| P00005: Angiogenesis                                                      | 21    | 5.3030 | 0.0038                  | 0.0363    |
| hsa04664: Fc epsilon RI signaling pathway                                 | 9     | 2.2727 | 0.0104                  | 0.0484    |

**Figure S1.** Percentage of direct interactions per gene-wise *p*-value for the six GWAS analyzed. For each  $-\text{Log}_{10}$  gene wise *p*-value cutoff in the x-axis the percentage of direct interactions was plotted for proteins encoded by disease-associated genes (red line) and for the mean of 1000 equal sized random samples of proteins (blue line), using the global PPI network (A) and the high-confidence PPI network (B). Dark grey areas represent the range between the 25th and 75th quartiles and light grey areas indicate the range between the minimum and maximum values of the random data. Empirical *p*-values are indicated.

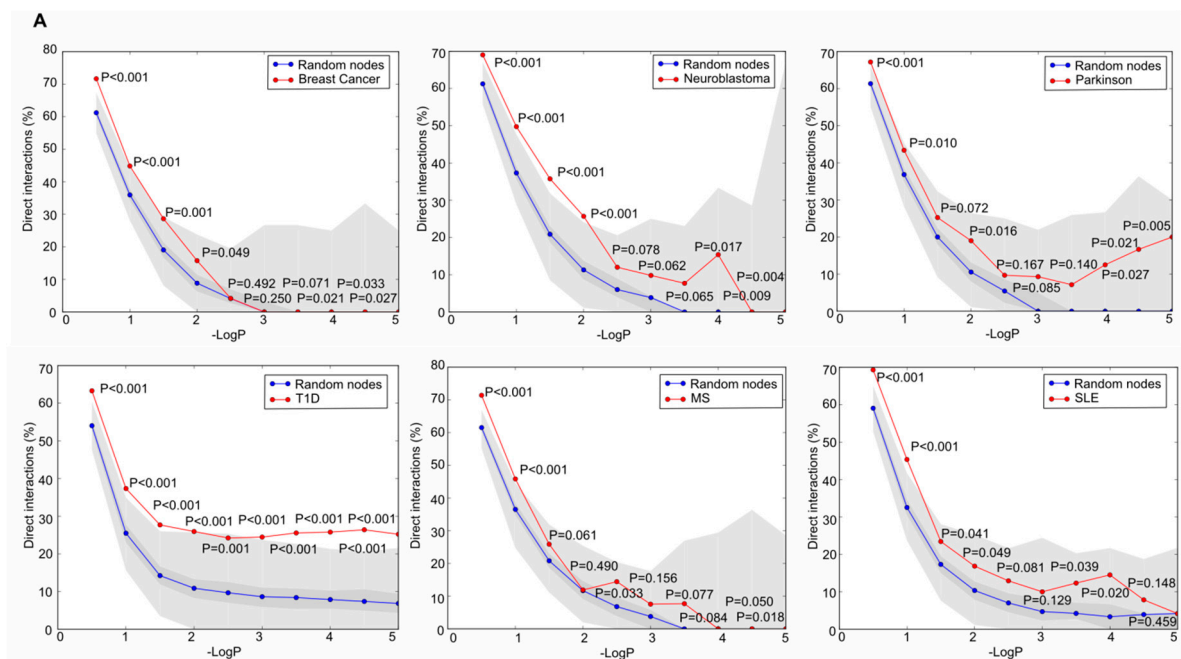

Figure S1. Cont.

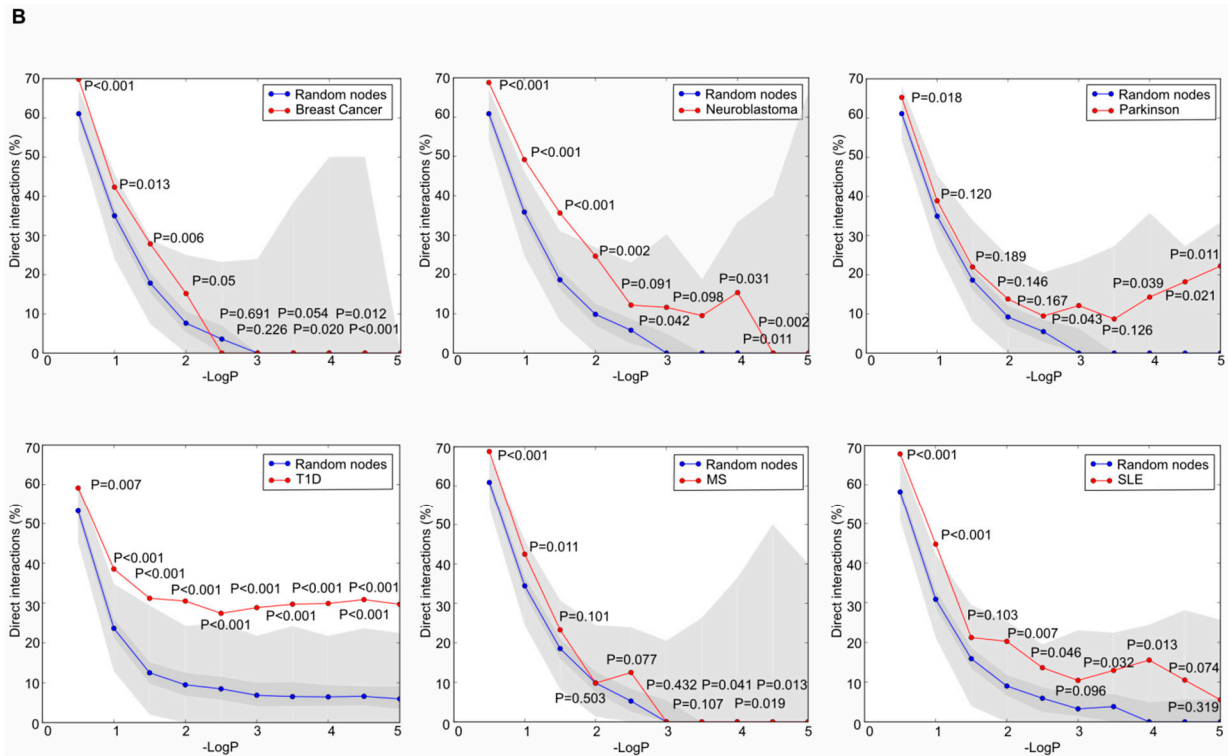

**Figure S2.** Percentage of isolated nodes per gene-wise  $p$ -value for the six GWAS analyzed. For each  $-\log_{10}$  gene wise  $p$ -value cutoff in the x-axis the percentage of isolated nodes was plotted for proteins encoded by disease-associated genes (red line) and for the mean of 1000 equal sized random samples of proteins (blue line), using the global PPI network (A) and the high-confidence PPI network (B). Dark grey areas represent the range between the 25th and 75th quartiles and light gray areas indicate the range between the minimum and maximum values of the random data. Empirical  $p$ -values are indicated.

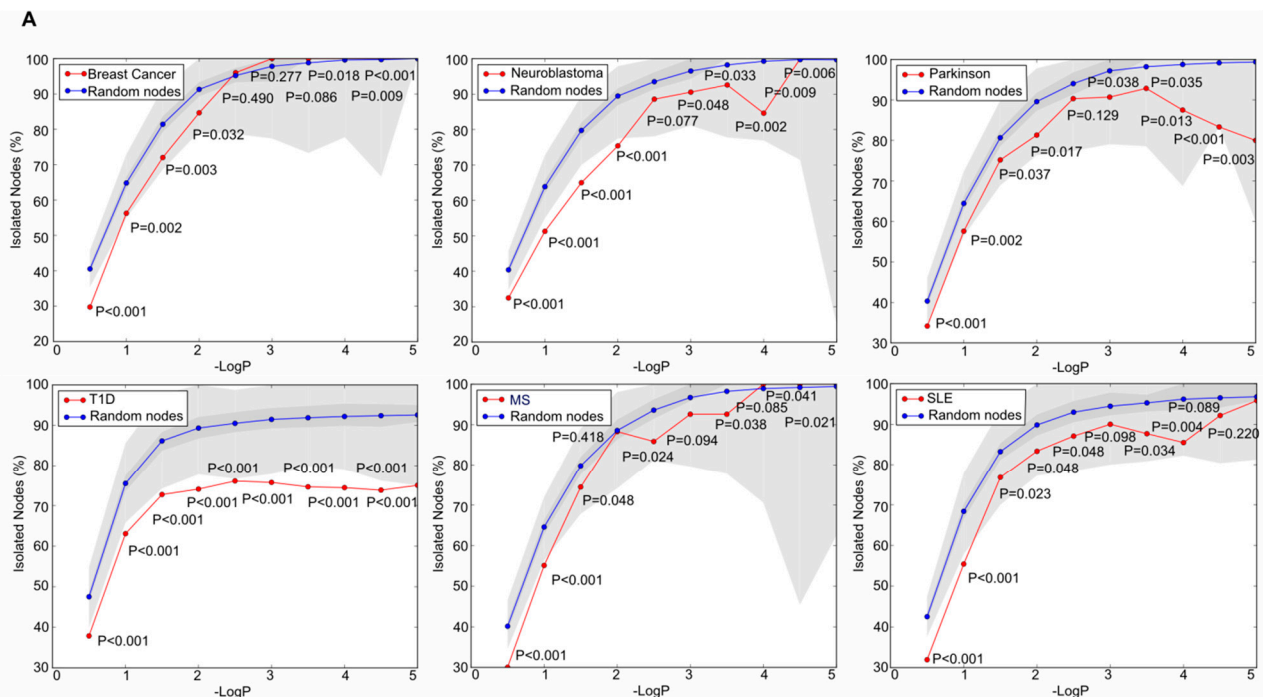

Figure S2. Cont.

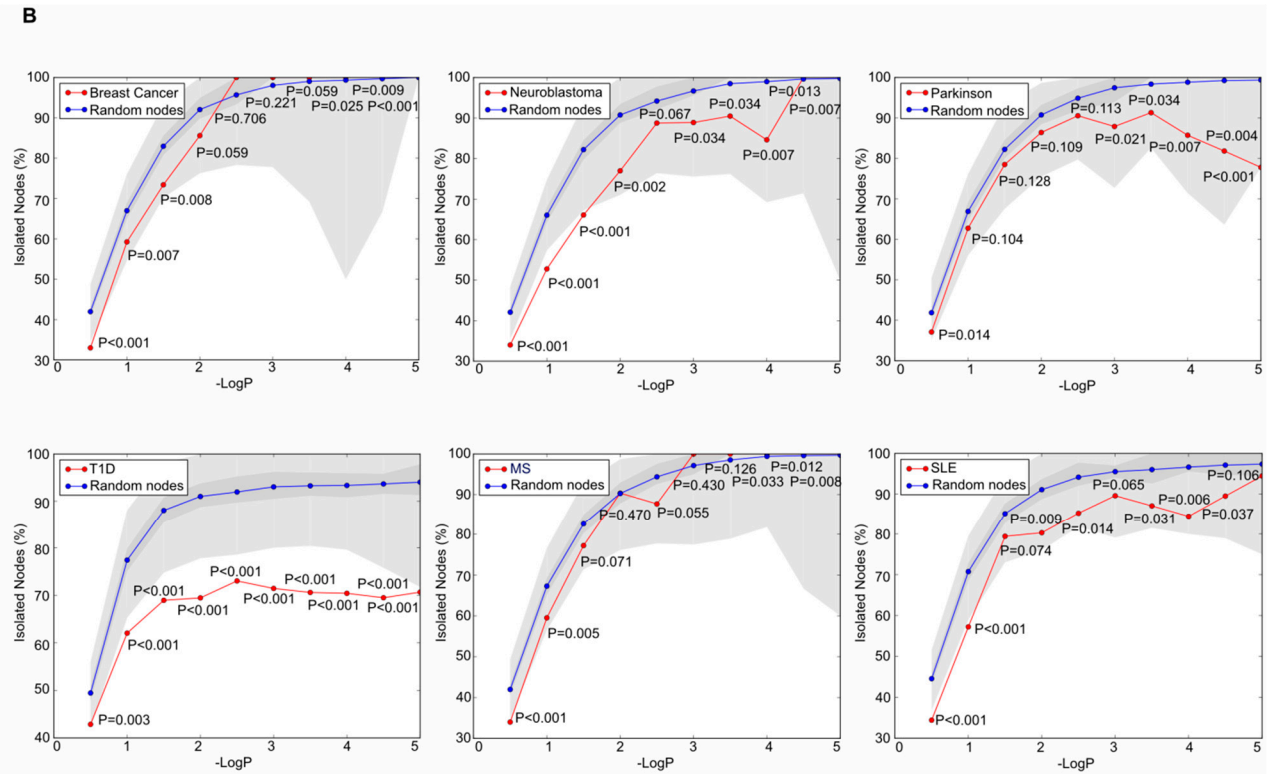

**Figure S3.** LCC size per gene-wise  $p$ -value for the six GWAS analyzed. For each  $-\log_{10}$  gene wise  $p$ -value cutoff in the x-axis the logarithm of the LCC size was plotted for proteins encoded by disease-associated genes (red line) and for the mean of 1000 equal sized random samples of proteins (blue line), using the global PPI network (A) and the high-confidence PPI network (B). Dark grey areas represent the range between the 25th and 75th quartiles and light gray areas indicate the range between the minimum and maximum values of the random data. Empirical  $p$ -values are indicated.

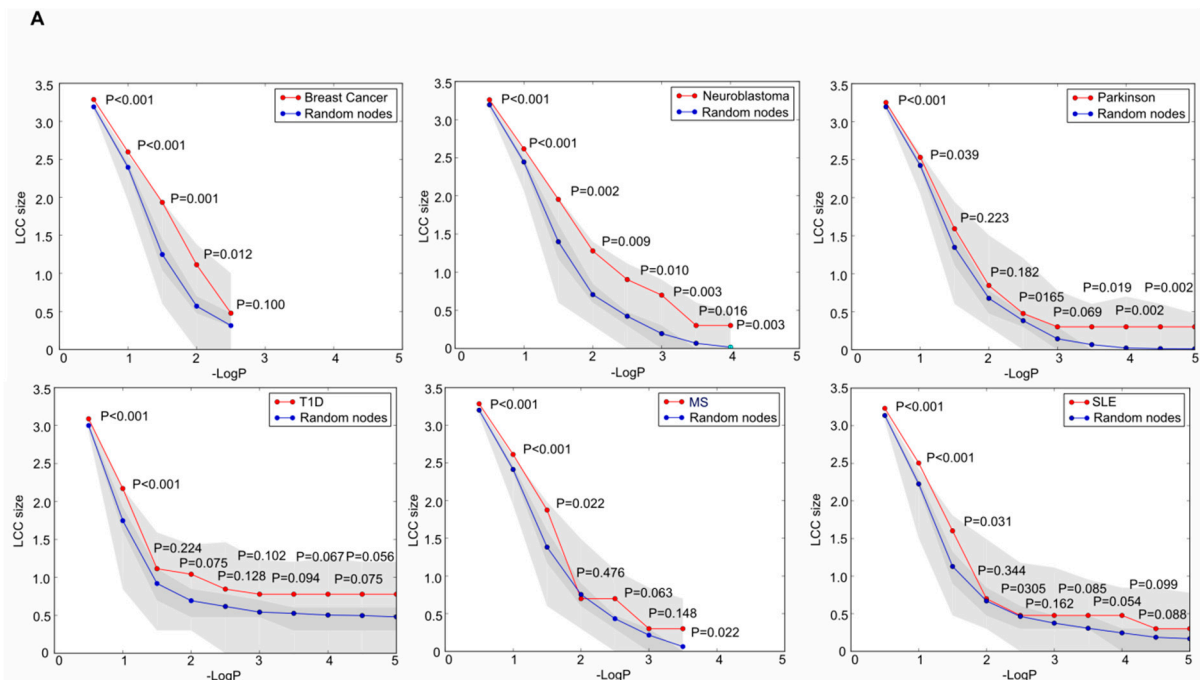

Figure S3. Cont.

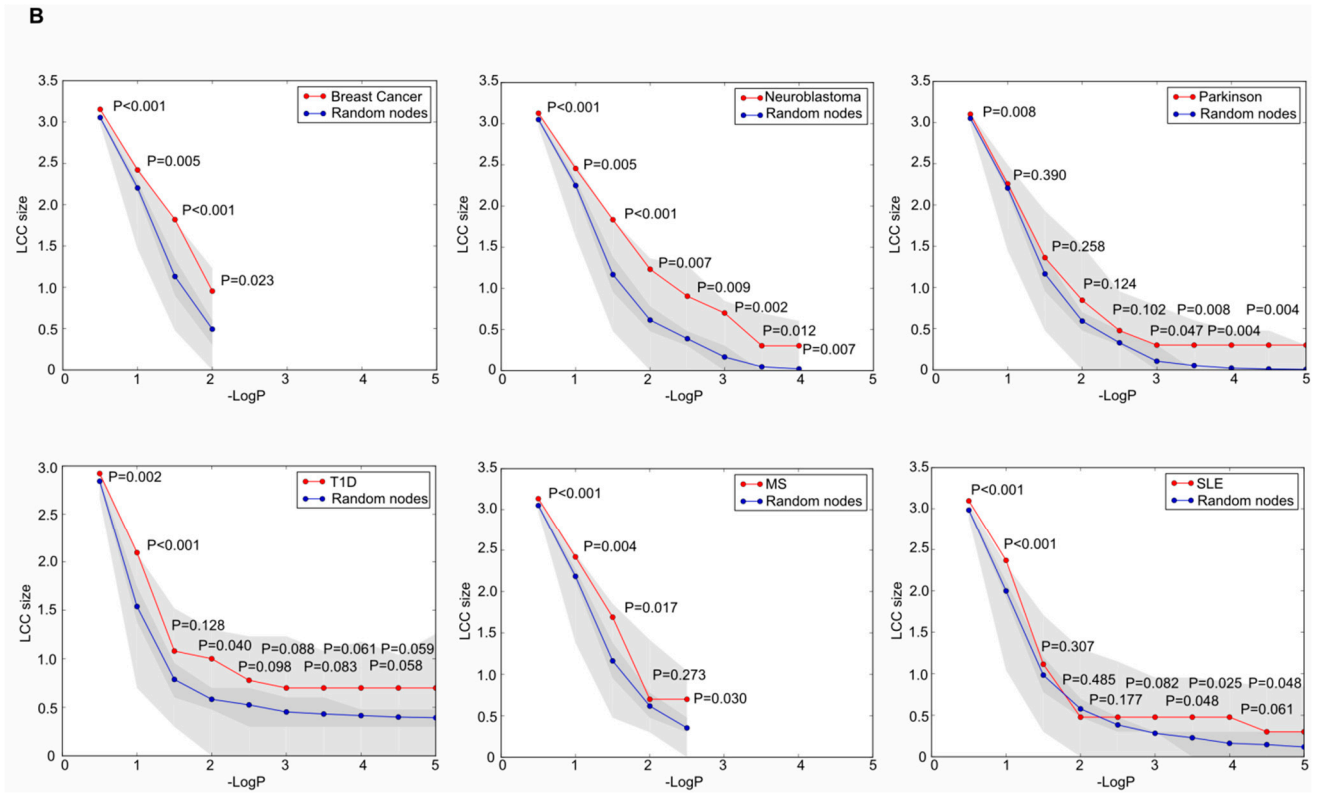

Supplement: ijms-15-17601-s001.pdf [file ijms-15-17601-s001.pdf]
